# Supplementary material for: Anti-CD22-conjugated CdTe QDs co-loaded with doxorubicin and gambogic acid: a novel platform for lymphoma treatment
Source: Royal Society of Chemistry journal article supplement (doi:10.1039/c7ra04056c), 2017-01-01
Supplement: c7ra04056c1.pdf [file c7ra04056c1.pdf]

### Supplementary Information

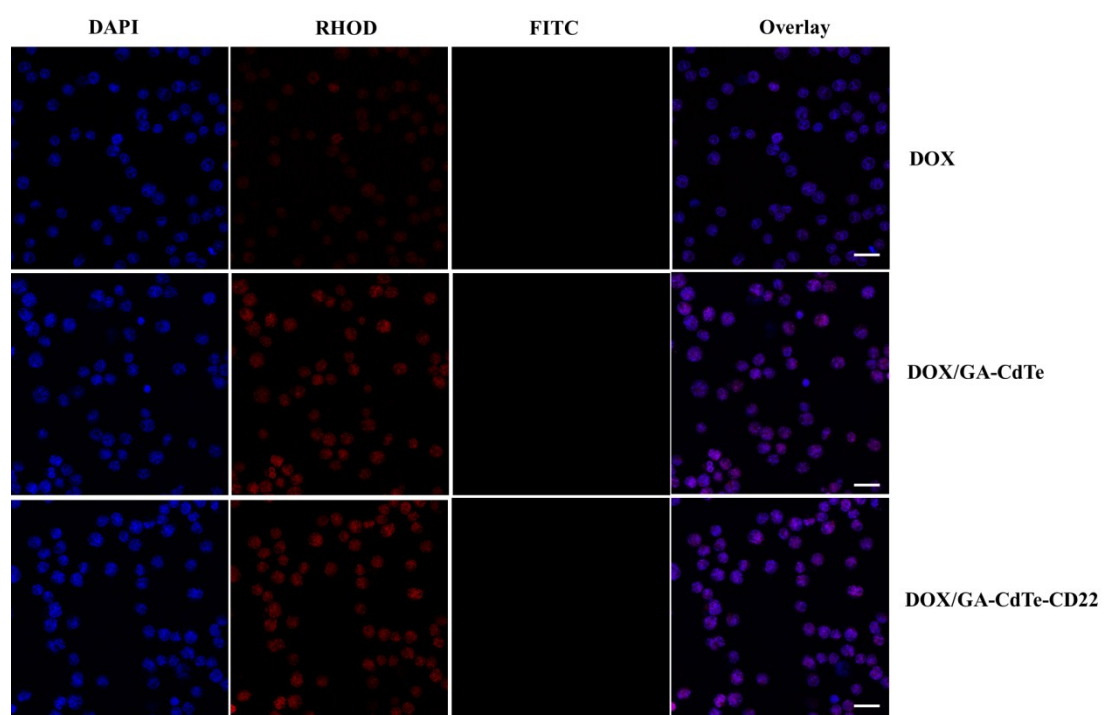

**Supplementary Figure S1.** Fluorescence images of Jurkat cells respectively treated with DOX, DOX/GA-CdTe and DOX/GA-CdTe-CD22 after DAPI staining (scale bar: 20  $\mu\text{m}$ ,  $\times 200$ ). FITC-conjugated anti-mouse IgG was used as the secondary antibodies for anti-CD22 mAbs.
